# Supplementary material
Source: PubMed Central journal article supplement (PMC9875796)
Supplement: tp-107-457-s001.pdf [file tp-107-457-s001.pdf]

# of humoral and cellular responses in renal transplant recipients three doses of SARS-COV-2 mRNA vaccine

the nephrology department  
in 10 dialysis facilities

100 kidney transplant  
recipients

77 Dialysis patients  
58 Haemodialysis  
19 Peritoneal dialysis

2 Healthy controls

all received Sars-CoV2  
mRNA vaccine

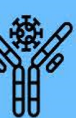

Spike<sup>+</sup>

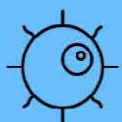

IFN $\gamma$ <sup>+</sup> T-cells

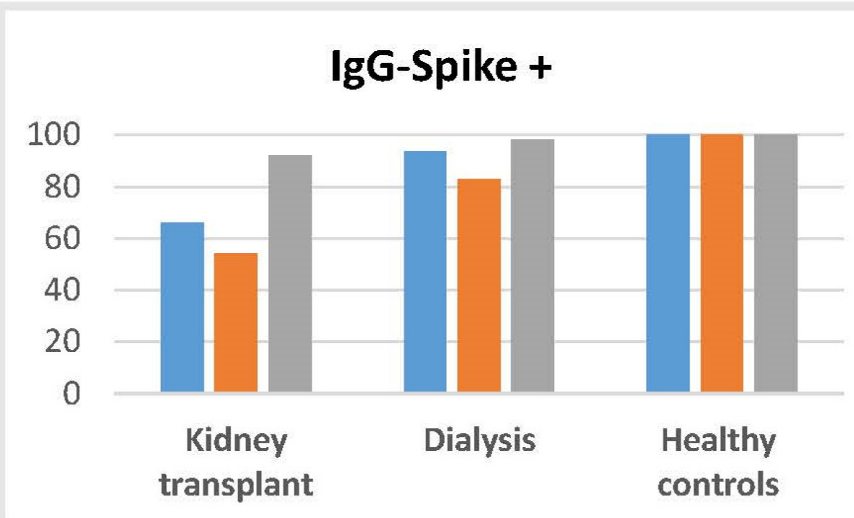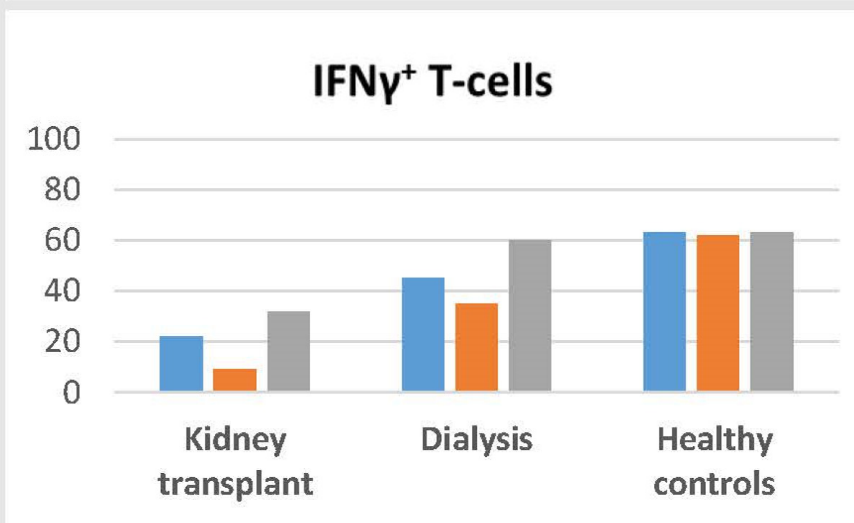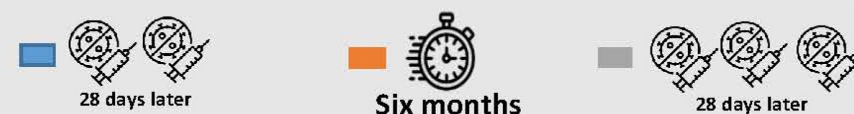

High-an  
(>3073

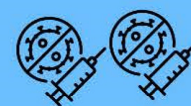

3%

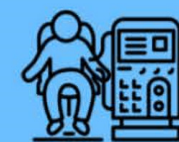

2-6%

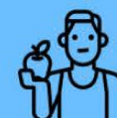

38%

**Conclusions:** The t  
mRNA vaccine impro  
and cellular resp  
effectively in ki  
recipients compar  
patients and healthy

s C & Crespo M. *Transplantation*. 2022

t by @TransplantJrnl

Copyright © 2020 Wolters Kluwer Health, Inc. All rights reserved

**Transplant**
